# Supplementary material
Source: PubMed Central journal article supplement (PMC3078039)
Supplement: NIHMS255337-supplement-1_si_001.pdf [file NIHMS255337-supplement-1_si_001.pdf]

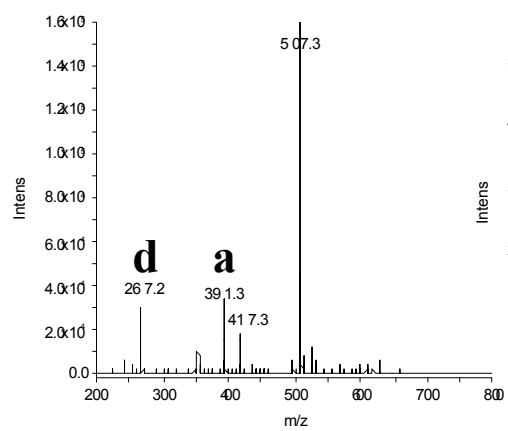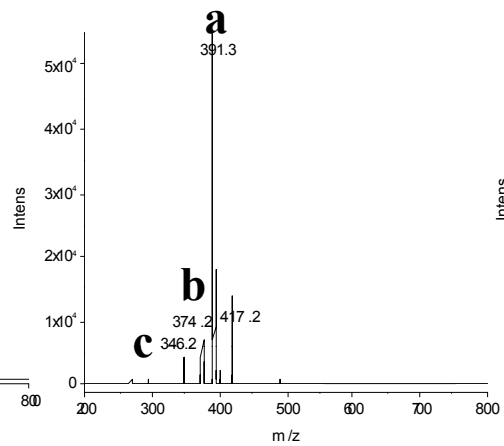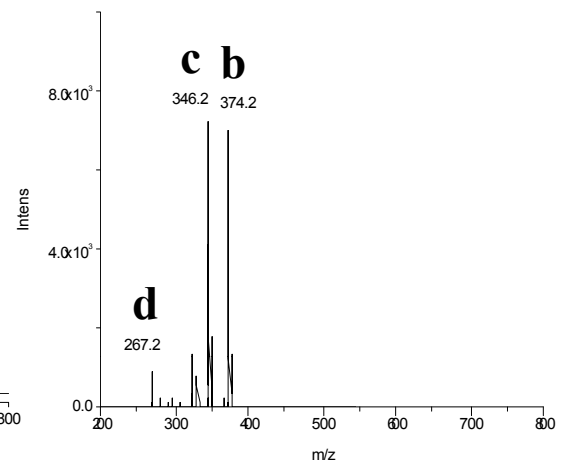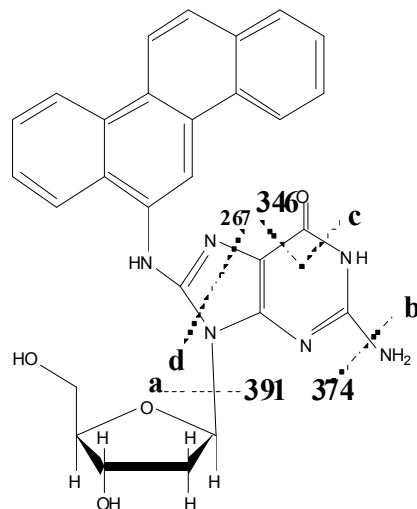

..... Figure S1

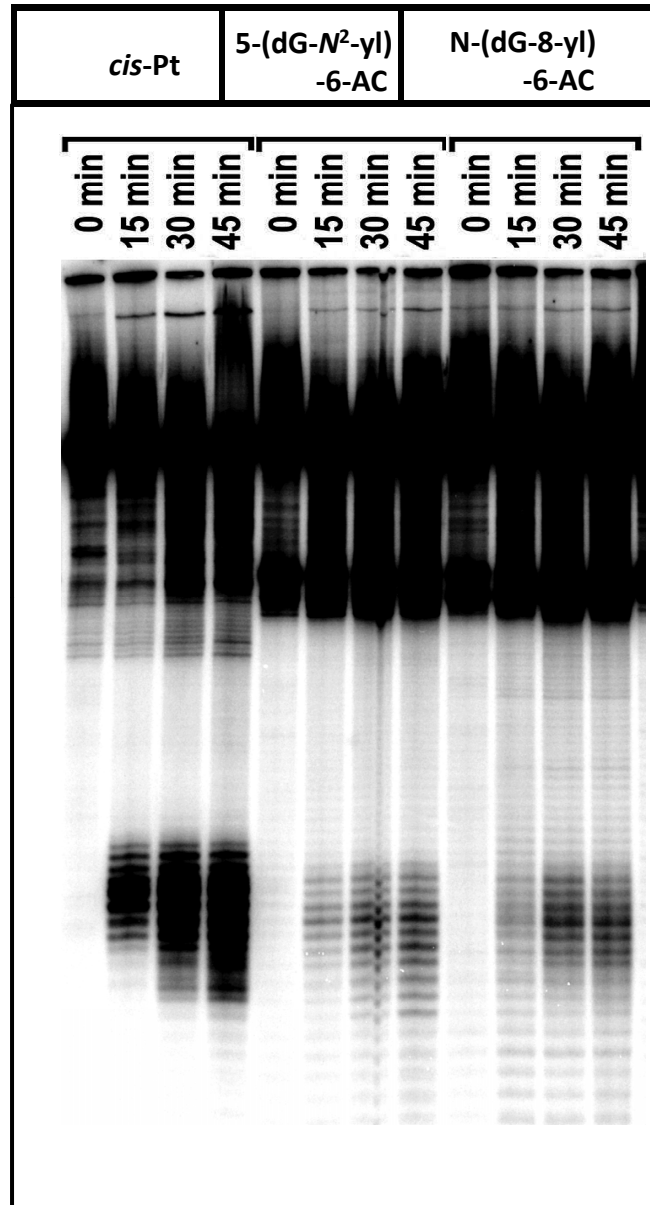

..... Figure S2

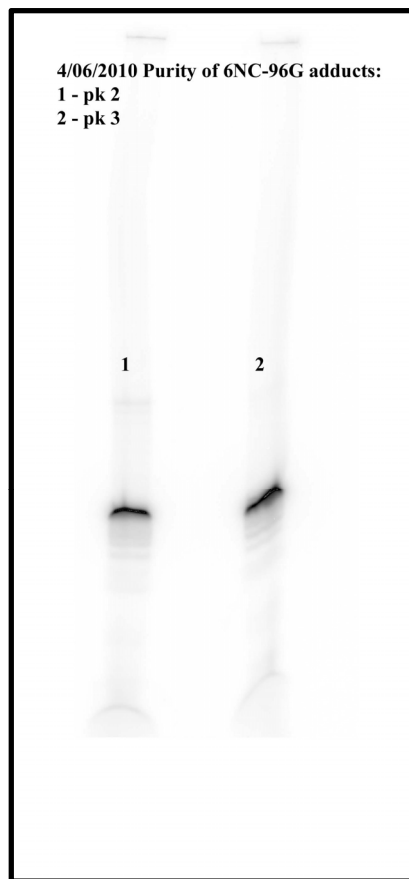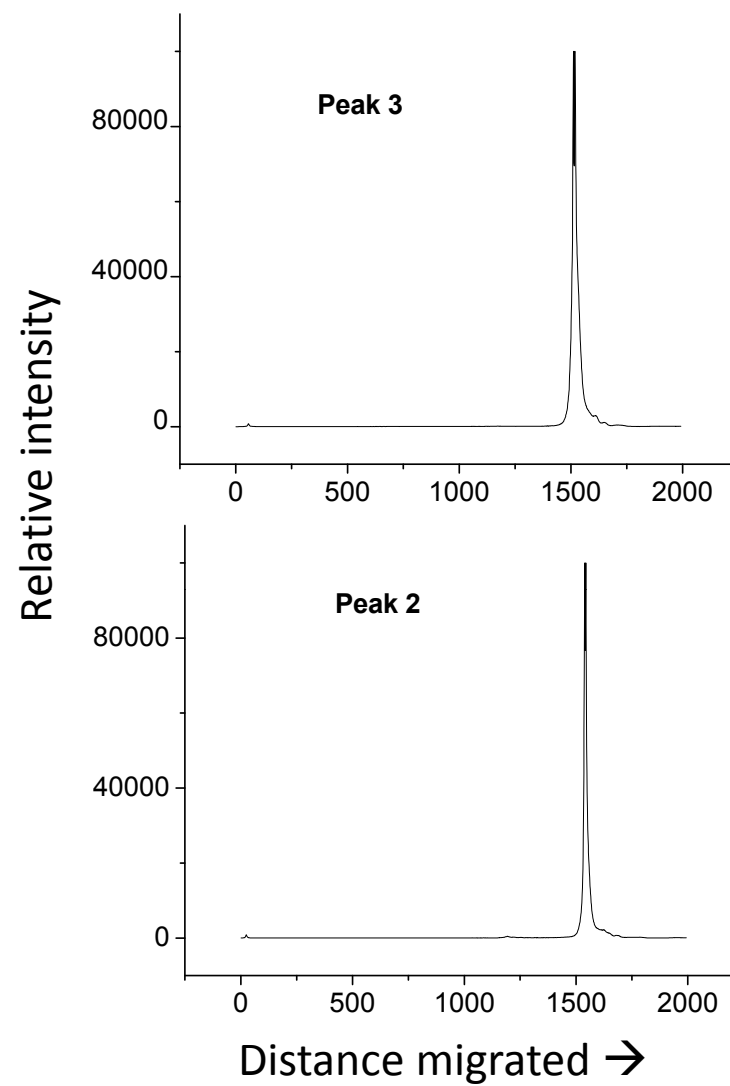

..... Figure S3

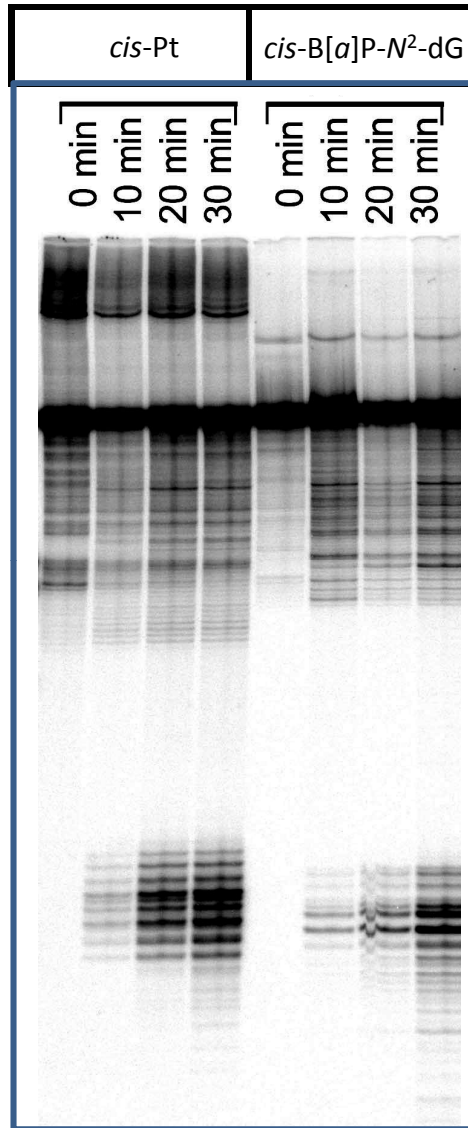

..... Fig S4

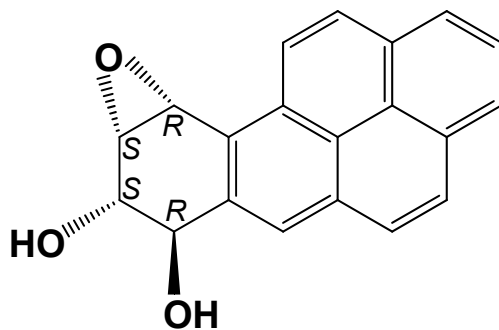

(+)-*anti*-B[a]PDE

(+)-7*R*,8*S*,9*S*,10*R*-7,8-dihydroxy-9,10-epoxy-7,8,9,10-tetrahydrobenzo[a]pyrene

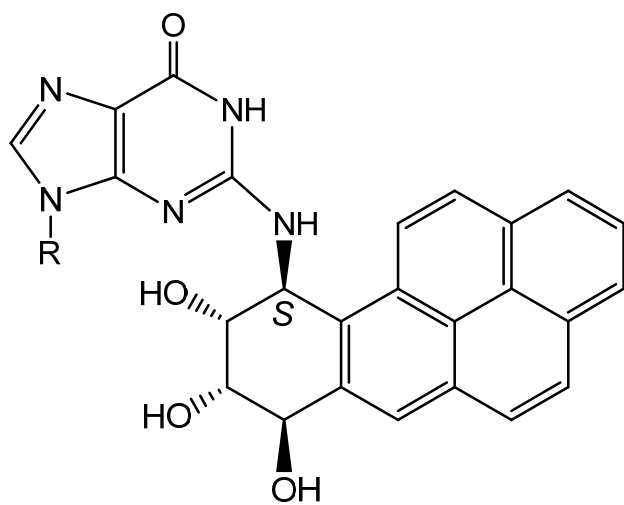

(+)-*trans*-B[a]P-*N*<sup>2</sup>-dG

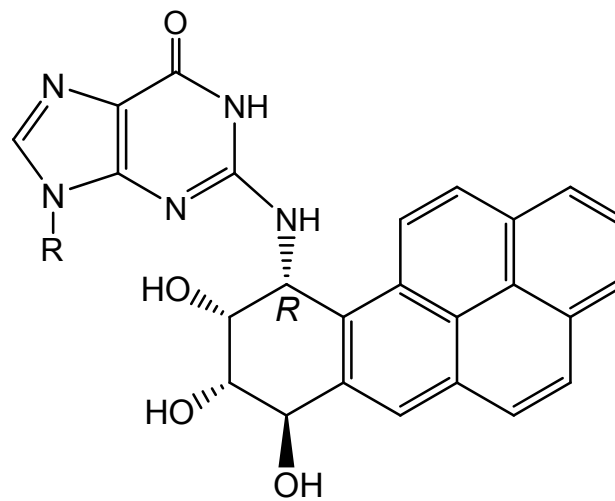

(+)-*cis*-B[a]P-*N*<sup>2</sup>-dG

.....Figure S5
